# Supplementary material for: Effect of surface acidity of cyano-bridged polynuclear metal complexes on the catalytic activity for the hydrolysis of organophosphates
Source: Royal Society of Chemistry journal article supplement (doi:10.1039/c8cy01015c), 2018-01-01
Supplement: c8cy01015c1.pdf [file c8cy01015c1.pdf]

## **Electronic Supplementary Information (ESI)**

### **Effect of surface acidity of cyano-bridged polynuclear metal complexes on catalytic activity for hydrolysis of organophosphates**

*Hiroyasu Tabe, Chihiro Terashima and Yusuke Yamada\**

Department of Applied Chemistry and Bioengineering, Graduate School of Engineering, Osaka City University, Osaka 558-8585, Japan.

\* To whom correspondence should be addressed.

E-mail: [ymd@a-chem.eng.osaka-cu.ac.jp](mailto:ymd@a-chem.eng.osaka-cu.ac.jp).

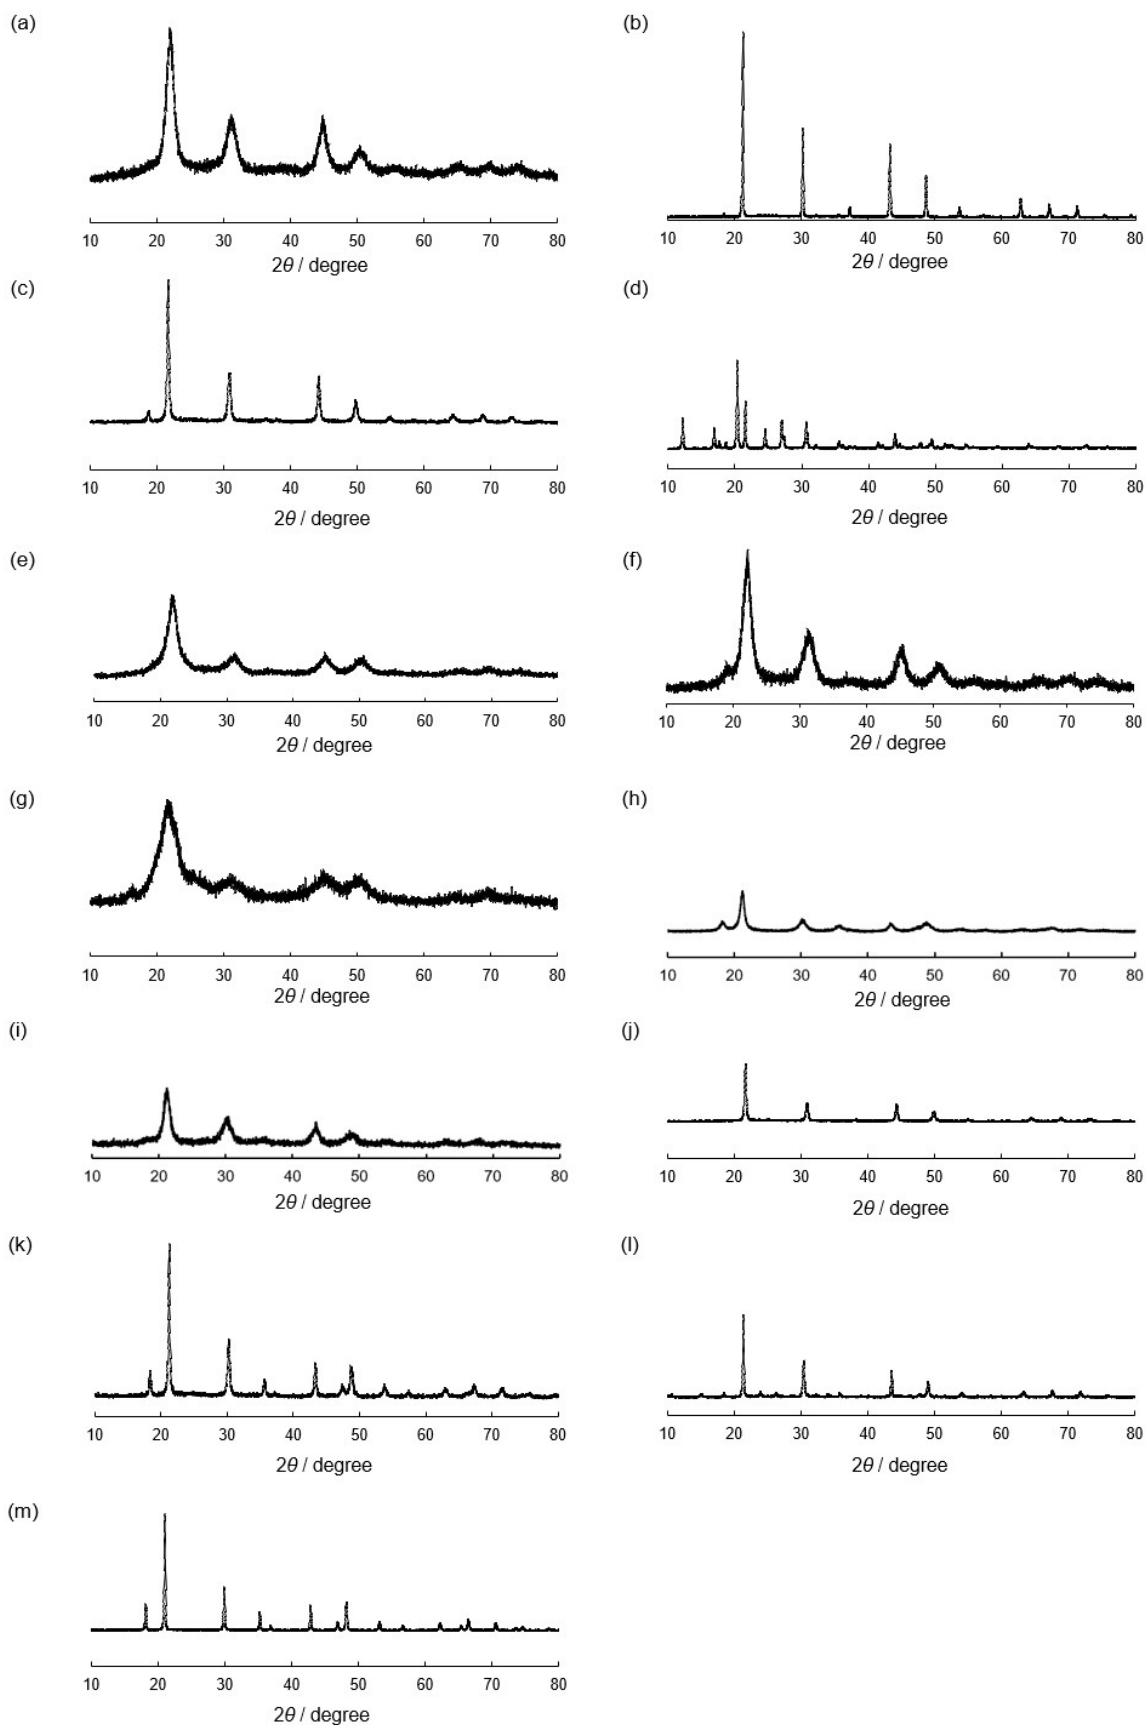

**Fig. S1** Powder X-ray diffraction patterns of cyano-bridged polynuclear metal complexes. [(a)  $[\text{Fe}^{\text{III}}(\text{H}_2\text{O})_{1.5}]_{4/3}[\text{Fe}^{\text{II}}(\text{CN})_6]$ , (b)  $[\text{Mn}^{\text{II}}(\text{H}_2\text{O})_2]_{1.5}[\text{Fe}^{\text{III}}(\text{CN})_6]$ , (c)  $[\text{Co}^{\text{II}}(\text{H}_2\text{O})_2]_{1.5}[\text{Fe}^{\text{III}}(\text{CN})_6]$ , (d)  $[\text{Zn}^{\text{II}}(\text{H}_2\text{O})_2]_{1.5}[\text{Fe}^{\text{III}}(\text{CN})_6]$ , (e)  $\text{Ga}^{\text{III}}[\text{Fe}^{\text{III}}(\text{CN})_6]$ , (f)  $[\text{Ga}^{\text{III}}(\text{H}_2\text{O})_{1.5}]_{4/3}[\text{Fe}^{\text{II}}(\text{CN})_6]$ , (g)  $\text{Fe}^{\text{III}}[\text{Co}^{\text{III}}(\text{CN})_6]$ , (h)  $\text{Fe}^{\text{III}}[\text{Ir}^{\text{III}}(\text{CN})_6]$ , (i)  $[\text{Fe}^{\text{III}}(\text{H}_2\text{O})_{1.5}]_{4/3}[\text{Ru}^{\text{II}}(\text{CN})_6]$ , (j)  $[\text{Fe}^{\text{II}}(\text{H}_2\text{O})_2]_{1.5}[\text{Co}^{\text{III}}(\text{CN})_6]$ , (k)  $[\text{Fe}^{\text{II}}(\text{H}_2\text{O})_2]_{1.5}[\text{Ir}^{\text{III}}(\text{CN})_6]$ , (l)  $[\text{Fe}^{\text{II}}(\text{H}_2\text{O})_3]_2[\text{Ru}^{\text{II}}(\text{CN})_6]$  and (m)  $\text{Fe}^{\text{II}}[\text{Pt}^{\text{IV}}(\text{CN})_6]$ ]

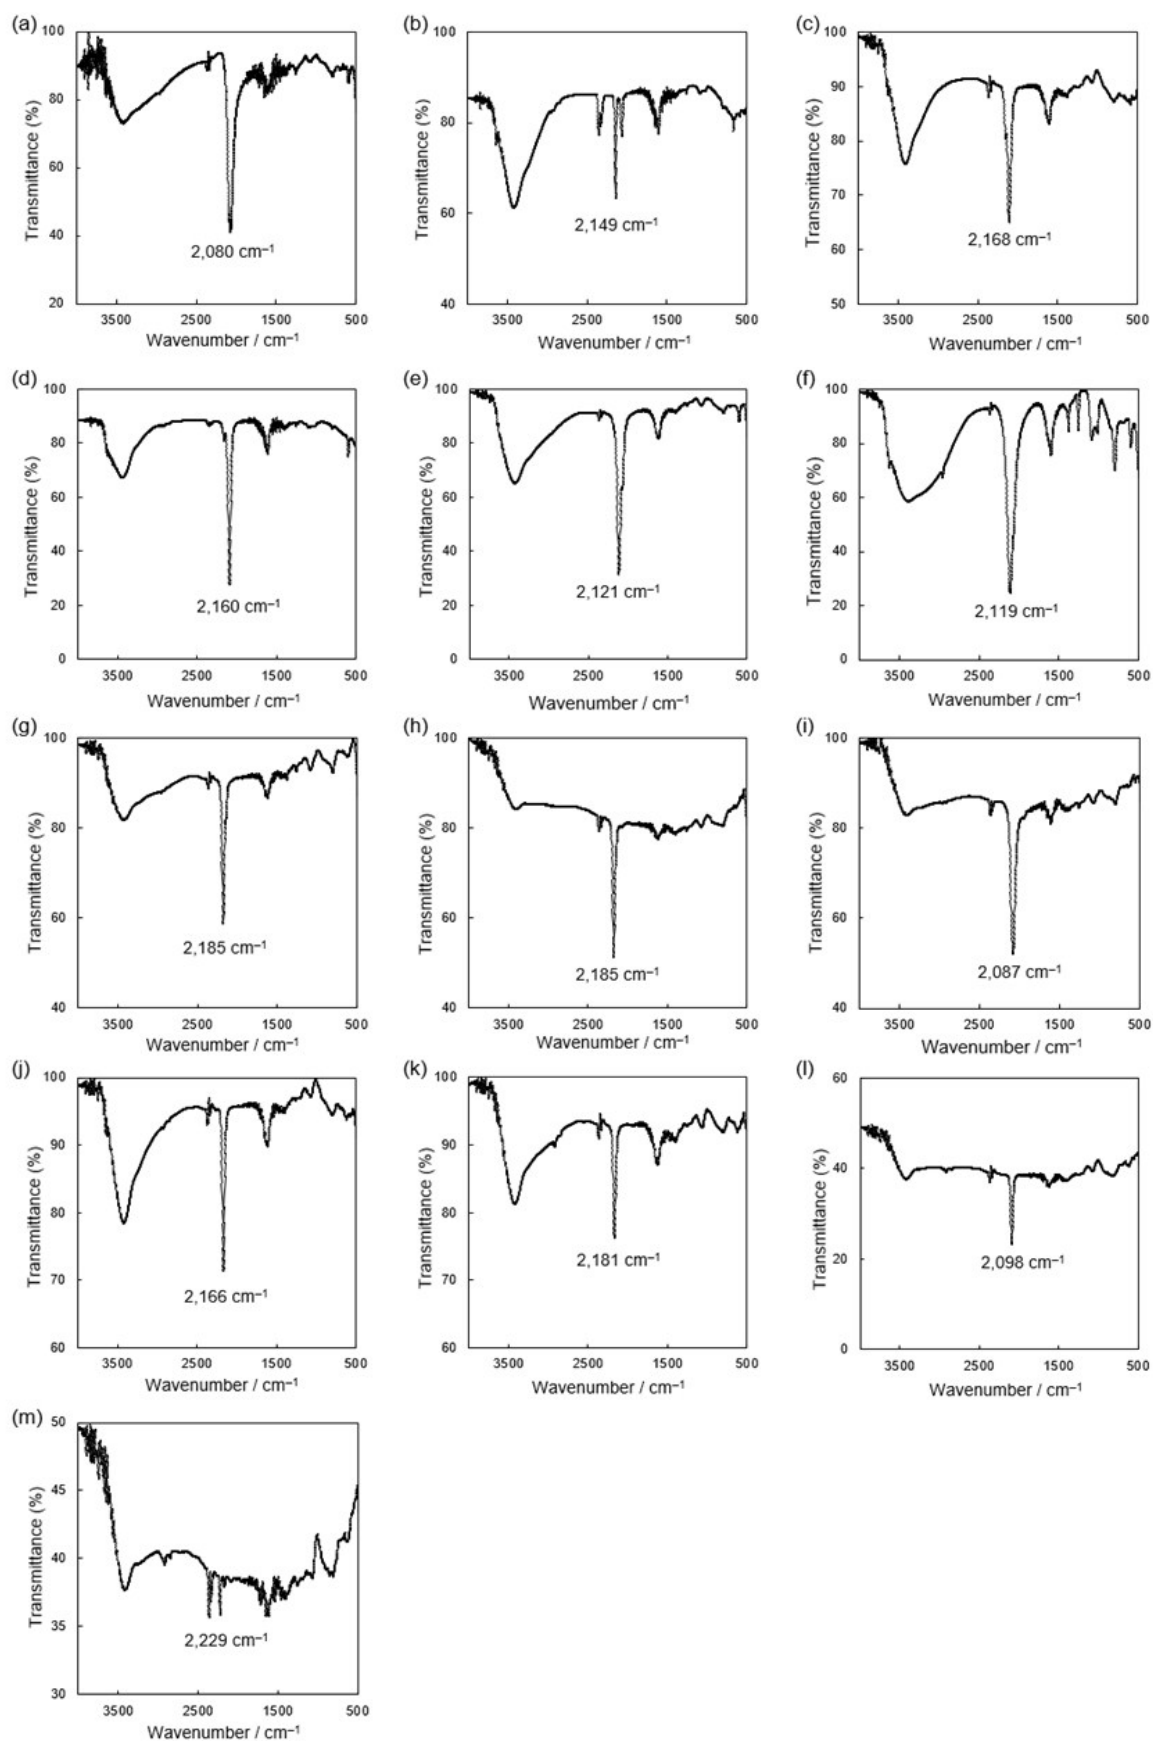

**Fig. S2** IR spectra of cyano-bridged polynuclear metal complexes. [(a)  $[\text{Fe}^{\text{III}}(\text{H}_2\text{O})_{1.5}]_{4/3}[\text{Fe}^{\text{II}}(\text{CN})_6]$ , (b)  $[\text{Mn}^{\text{II}}(\text{H}_2\text{O})_2]_{1.5}[\text{Fe}^{\text{III}}(\text{CN})_6]$ , (c)  $[\text{Co}^{\text{II}}(\text{H}_2\text{O})_2]_{1.5}[\text{Fe}^{\text{III}}(\text{CN})_6]$ , (d)  $[\text{Zn}^{\text{II}}(\text{H}_2\text{O})_2]_{1.5}[\text{Fe}^{\text{III}}(\text{CN})_6]$ , (e)  $\text{Ga}^{\text{III}}[\text{Fe}^{\text{III}}(\text{CN})_6]$ , (f)  $[\text{Ga}^{\text{III}}(\text{H}_2\text{O})_{1.5}]_{4/3}[\text{Fe}^{\text{II}}(\text{CN})_6]$  (g)  $\text{Fe}^{\text{III}}[\text{Co}^{\text{III}}(\text{CN})_6]$ , (h)  $\text{Fe}^{\text{III}}[\text{Ir}^{\text{III}}(\text{CN})_6]$ , (i)  $[\text{Fe}^{\text{III}}(\text{H}_2\text{O})_{1.5}]_{4/3}[\text{Ru}^{\text{II}}(\text{CN})_6]$ , (j)  $[\text{Fe}^{\text{II}}(\text{H}_2\text{O})_2]_{1.5}[\text{Co}^{\text{III}}(\text{CN})_6]$ , (k)  $[\text{Fe}^{\text{II}}(\text{H}_2\text{O})_2]_{1.5}[\text{Ir}^{\text{III}}(\text{CN})_6]$ , (l)  $[\text{Fe}^{\text{II}}(\text{H}_2\text{O})_3]_2[\text{Ru}^{\text{II}}(\text{CN})_6]$  and (m)  $\text{Fe}^{\text{II}}[\text{Pt}^{\text{IV}}(\text{CN})_6]$ ]

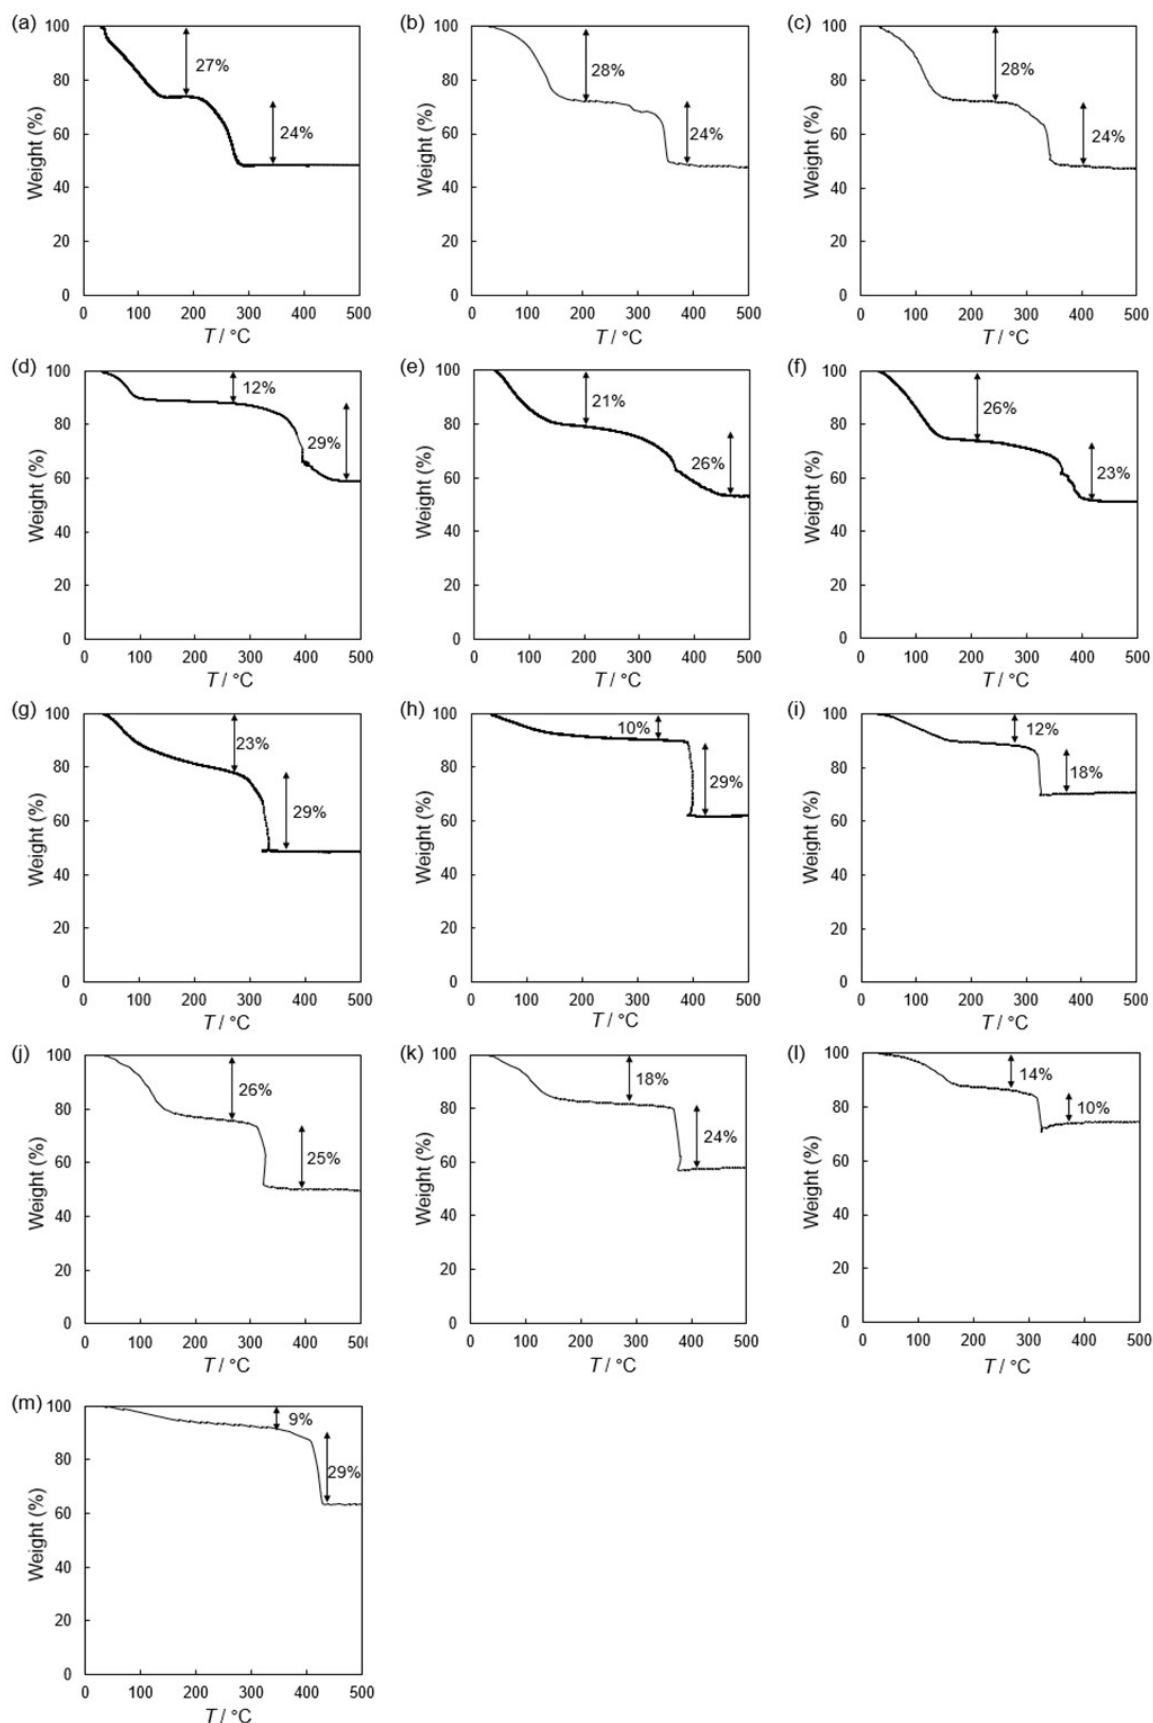

**Fig. S3** Thermogravimetric analyses of cyano-bridged polynuclear metal complexes in an air flow. [(a)  $[\text{Fe}^{\text{III}}(\text{H}_2\text{O})_{1.5}]_{4/3}[\text{Fe}^{\text{II}}(\text{CN})_6]$ , (b)  $[\text{Mn}^{\text{II}}(\text{H}_2\text{O})_2]_{1.5}[\text{Fe}^{\text{III}}(\text{CN})_6]$ , (c)  $[\text{Co}^{\text{II}}(\text{H}_2\text{O})_2]_{1.5}[\text{Fe}^{\text{III}}(\text{CN})_6]$ , (d)  $[\text{Zn}^{\text{II}}(\text{H}_2\text{O})_2]_{1.5}[\text{Fe}^{\text{III}}(\text{CN})_6]$ , (e)  $\text{Ga}^{\text{III}}[\text{Fe}^{\text{III}}(\text{CN})_6]$ , (f)  $[\text{Ga}^{\text{III}}(\text{H}_2\text{O})_{1.5}]_{4/3}[\text{Fe}^{\text{II}}(\text{CN})_6]$  (g)  $\text{Fe}^{\text{III}}[\text{Co}^{\text{III}}(\text{CN})_6]$ , (h)  $\text{Fe}^{\text{III}}[\text{Ir}^{\text{III}}(\text{CN})_6]$ , (i)  $[\text{Fe}^{\text{III}}(\text{H}_2\text{O})_{1.5}]_{4/3}[\text{Ru}^{\text{II}}(\text{CN})_6]$ , (j)  $[\text{Fe}^{\text{II}}(\text{H}_2\text{O})_2]_{1.5}[\text{Co}^{\text{III}}(\text{CN})_6]$ , (k)  $[\text{Fe}^{\text{II}}(\text{H}_2\text{O})_2]_{1.5}[\text{Ir}^{\text{III}}(\text{CN})_6]$ , (l)  $[\text{Fe}^{\text{II}}(\text{H}_2\text{O})_3]_2[\text{Ru}^{\text{II}}(\text{CN})_6]$  and (m)  $\text{Fe}^{\text{II}}[\text{Pt}^{\text{IV}}(\text{CN})_6]$ ]

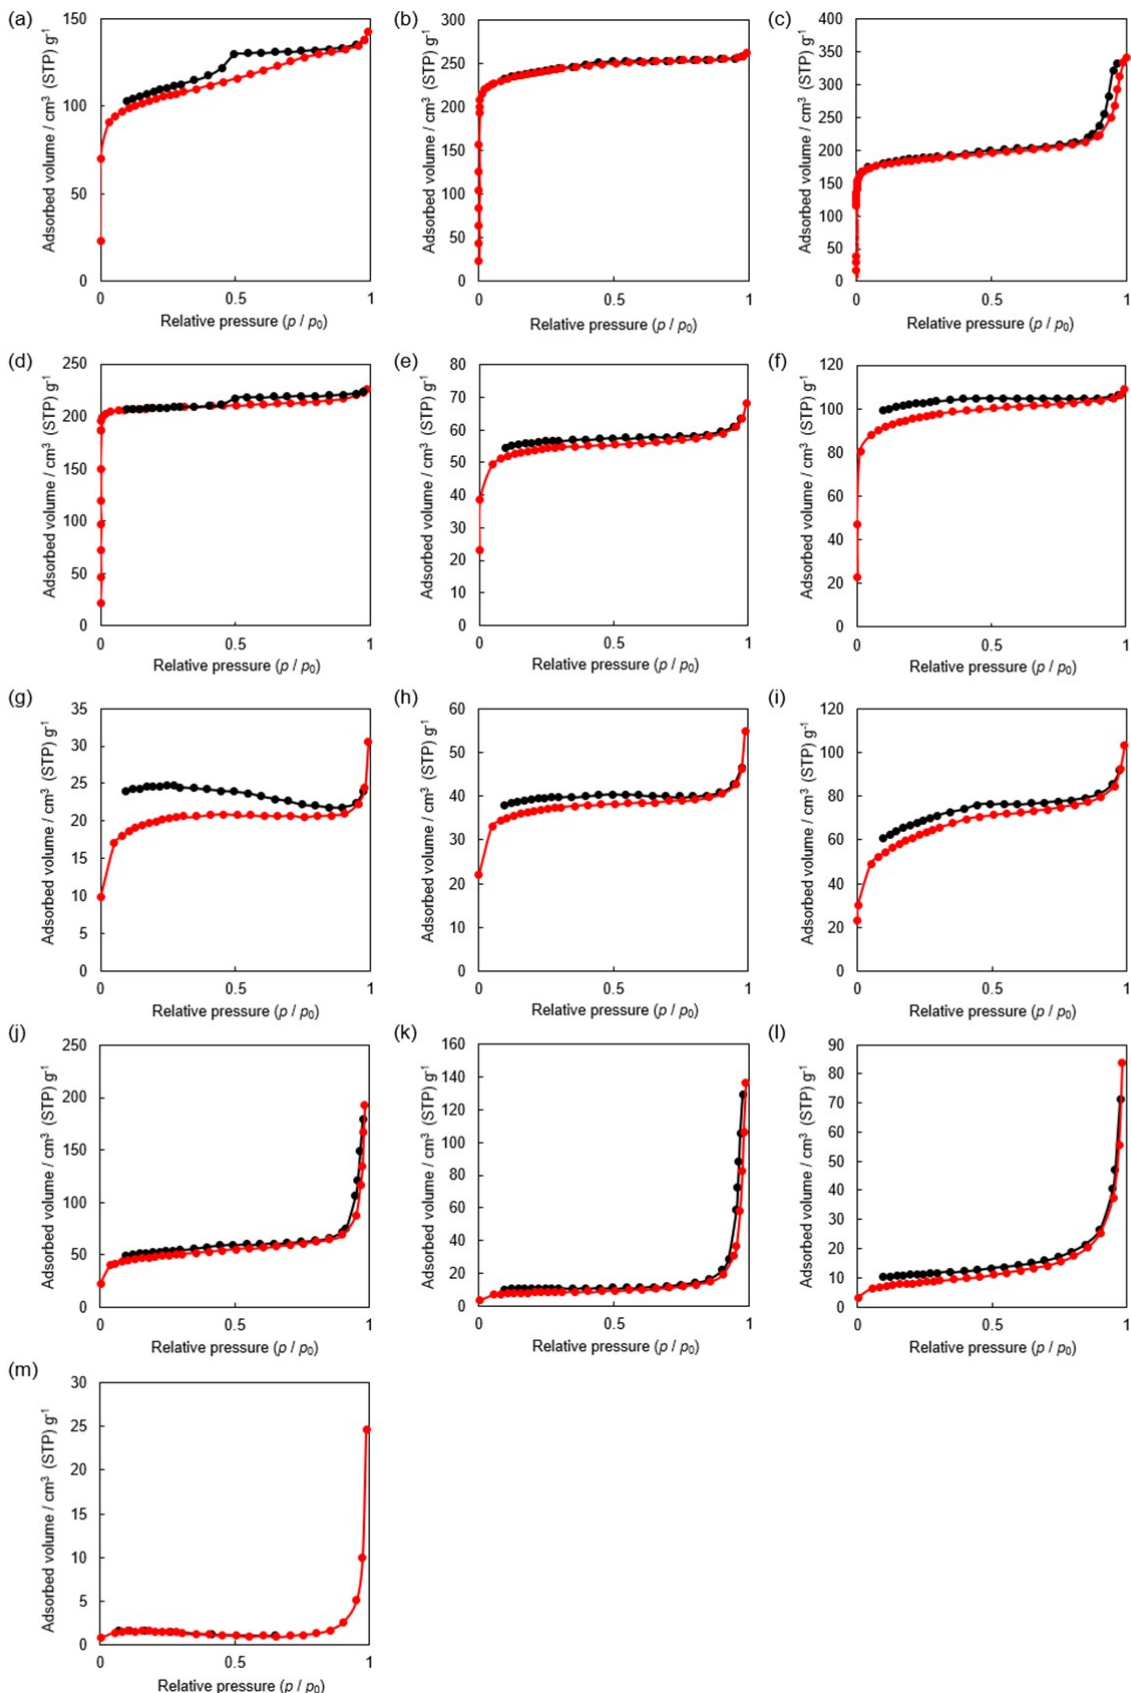

**Fig. S4** Nitrogen adsorption (red)–desorption (black) isotherms at  $-196\text{ }^{\circ}\text{C}$  for cyano-bridged polynuclear metal complexes. [(a)  $[\text{Fe}^{\text{III}}(\text{H}_2\text{O})_{1.5}]_{4/3}[\text{Fe}^{\text{II}}(\text{CN})_6]$ , (b)  $[\text{Mn}^{\text{II}}(\text{H}_2\text{O})_2]_{1.5}[\text{Fe}^{\text{III}}(\text{CN})_6]$ , (c)  $[\text{Co}^{\text{II}}(\text{H}_2\text{O})_2]_{1.5}[\text{Fe}^{\text{III}}(\text{CN})_6]$ , (d)  $[\text{Zn}^{\text{II}}(\text{H}_2\text{O})_2]_{1.5}[\text{Fe}^{\text{III}}(\text{CN})_6]$ , (e)  $\text{Ga}^{\text{III}}[\text{Fe}^{\text{III}}(\text{CN})_6]$ , (f)  $[\text{Ga}^{\text{III}}(\text{H}_2\text{O})_{1.5}]_{4/3}[\text{Fe}^{\text{II}}(\text{CN})_6]$ , (g)  $\text{Fe}^{\text{III}}[\text{Co}^{\text{III}}(\text{CN})_6]$ , (h)  $\text{Fe}^{\text{III}}[\text{Ir}^{\text{III}}(\text{CN})_6]$ , (i)  $[\text{Fe}^{\text{III}}(\text{H}_2\text{O})_{1.5}]_{4/3}[\text{Ru}^{\text{II}}(\text{CN})_6]$ , (j)  $[\text{Fe}^{\text{II}}(\text{H}_2\text{O})_2]_{1.5}[\text{Co}^{\text{III}}(\text{CN})_6]$ , (k)  $[\text{Fe}^{\text{II}}(\text{H}_2\text{O})_2]_{1.5}[\text{Ir}^{\text{III}}(\text{CN})_6]$ , (l)  $[\text{Fe}^{\text{II}}(\text{H}_2\text{O})_3]_2[\text{Ru}^{\text{II}}(\text{CN})_6]$  and (m)  $\text{Fe}^{\text{II}}[\text{Pt}^{\text{IV}}(\text{CN})_6]$ ]

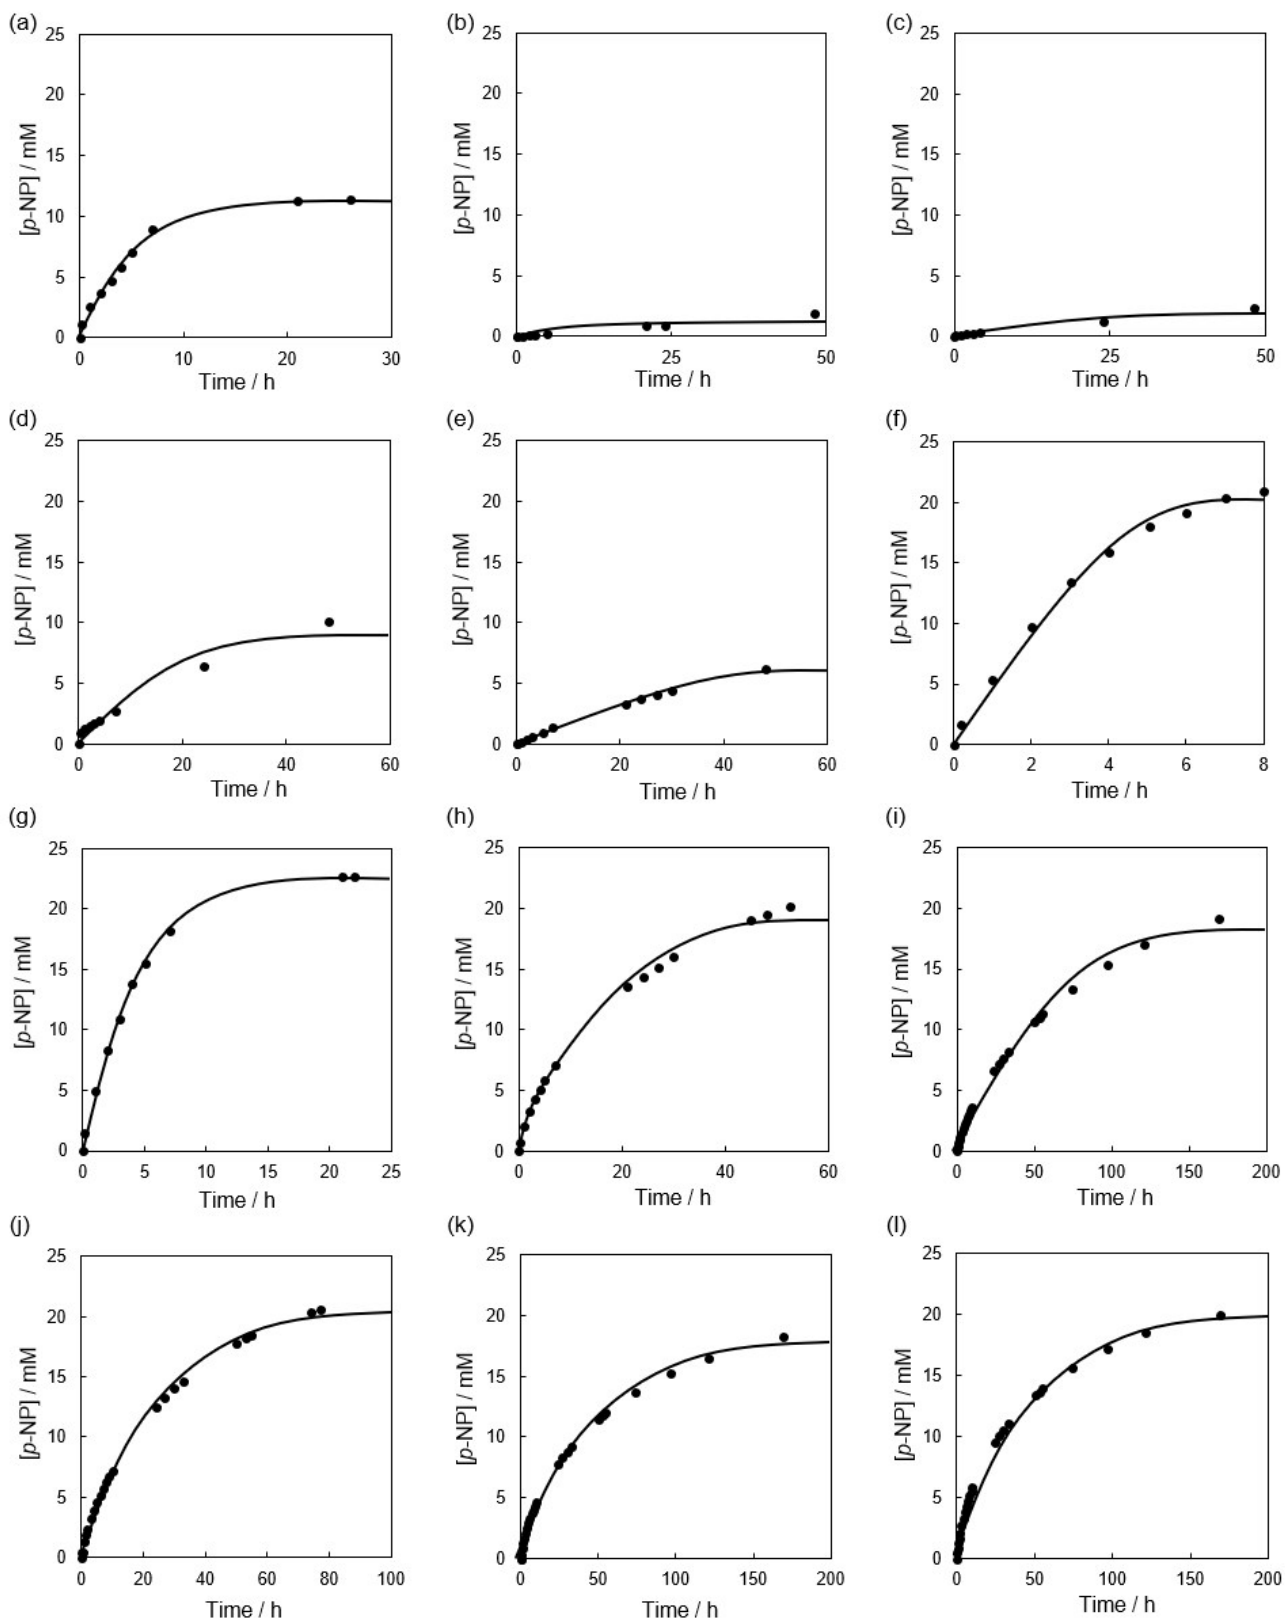

**Fig. S5** Time profiles of *p*-nitrophenol (*p*-NP) formation by hydrolysis of *p*-nitrophenyl phosphate (*p*-NPP, 25 mM) in a HEPES buffer (100 mM, pH 8.3, 0.75 mL) containing cyano-bridged polynuclear metal complexes. [(a)  $[\text{Mn}^{\text{II}}(\text{H}_2\text{O})_2]_{1.5}[\text{Fe}^{\text{III}}(\text{CN})_6]$ , (b)  $[\text{Co}^{\text{II}}(\text{H}_2\text{O})_2]_{1.5}[\text{Fe}^{\text{III}}(\text{CN})_6]$ , (c)  $[\text{Zn}^{\text{II}}(\text{H}_2\text{O})_2]_{1.5}[\text{Fe}^{\text{III}}(\text{CN})_6]$ , (d)  $\text{Ga}^{\text{III}}[\text{Fe}^{\text{III}}(\text{CN})_6]$ , (e)  $[\text{Ga}^{\text{III}}(\text{H}_2\text{O})_{1.5}]_{4/3}[\text{Fe}^{\text{II}}(\text{CN})_6]$ , (f)  $\text{Fe}^{\text{III}}[\text{Co}^{\text{III}}(\text{CN})_6]$ , (g)  $\text{Fe}^{\text{III}}[\text{Ir}^{\text{III}}(\text{CN})_6]$ , (h)  $[\text{Fe}^{\text{III}}(\text{H}_2\text{O})_{1.5}]_{4/3}[\text{Ru}^{\text{II}}(\text{CN})_6]$ , (i)  $[\text{Fe}^{\text{II}}(\text{H}_2\text{O})_2]_{1.5}[\text{Co}^{\text{III}}(\text{CN})_6]$ , (j)  $[\text{Fe}^{\text{II}}(\text{H}_2\text{O})_2]_{1.5}[\text{Ir}^{\text{III}}(\text{CN})_6]$ , (k)  $[\text{Fe}^{\text{II}}(\text{H}_2\text{O})_3]_2[\text{Ru}^{\text{II}}(\text{CN})_6]$  and (l)  $\text{Fe}^{\text{II}}[\text{Pt}^{\text{IV}}(\text{CN})_6]$ ]

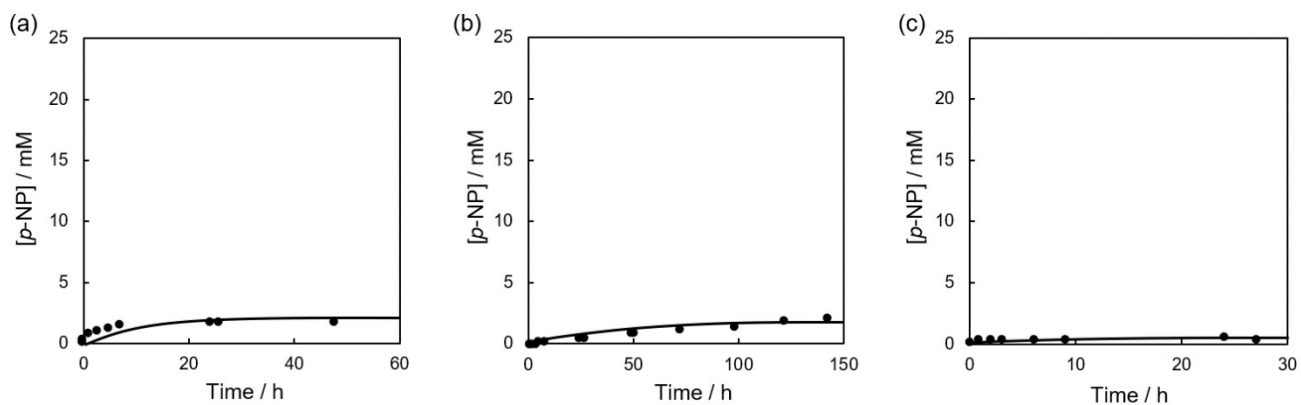

**Fig. S6** Time profiles of *p*-nitrophenol (*p*-NP) formation by hydrolysis of paraoxon methyl (PO, 25 mM) in a HEPES buffer (100 mM, pH 8.3, 0.75 mL) containing cyano-bridged polynuclear metal complexes. [(a)  $[\text{Fe}^{\text{III}}(\text{H}_2\text{O})_{1.5}]_{4/3}[\text{Fe}^{\text{II}}(\text{CN})_6]$ , (b)  $\text{Fe}^{\text{III}}[\text{Co}^{\text{III}}(\text{CN})_6]$  and (c) in the absence of catalysts]

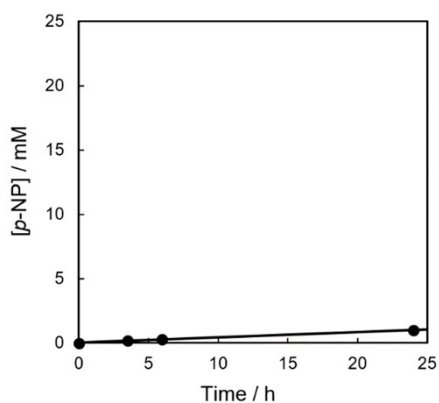

**Fig. S7** Time profiles of *p*-nitrophenol (*p*-NP) formation by hydrolysis of *p*-nitrophenyl phosphate (*p*-NPP, 25 mM) in a HEPES buffer (100 mM, pH 8.3, 0.75 mL) containing  $\text{Fe}(\text{NO}_3)_3$  ( $[\text{p-NPP}]/[\text{Fe}] = 100$ ).

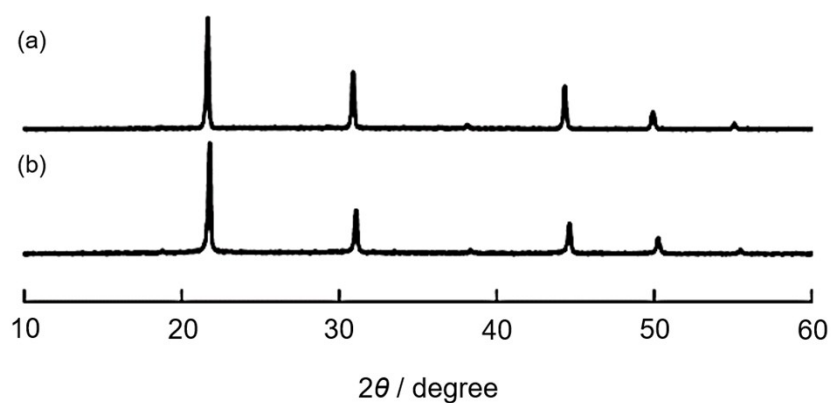

**Fig. S8** Powder X-ray diffraction patterns of  $[\text{Fe}^{\text{III}}(\text{H}_2\text{O})_{1.5}]_{4/3}[\text{Fe}^{\text{II}}(\text{CN})_6]$  (Prussian blue) nanoparticles in (a) cubic shape (PB-cube) and (b) spherical shape (PB-sphere).

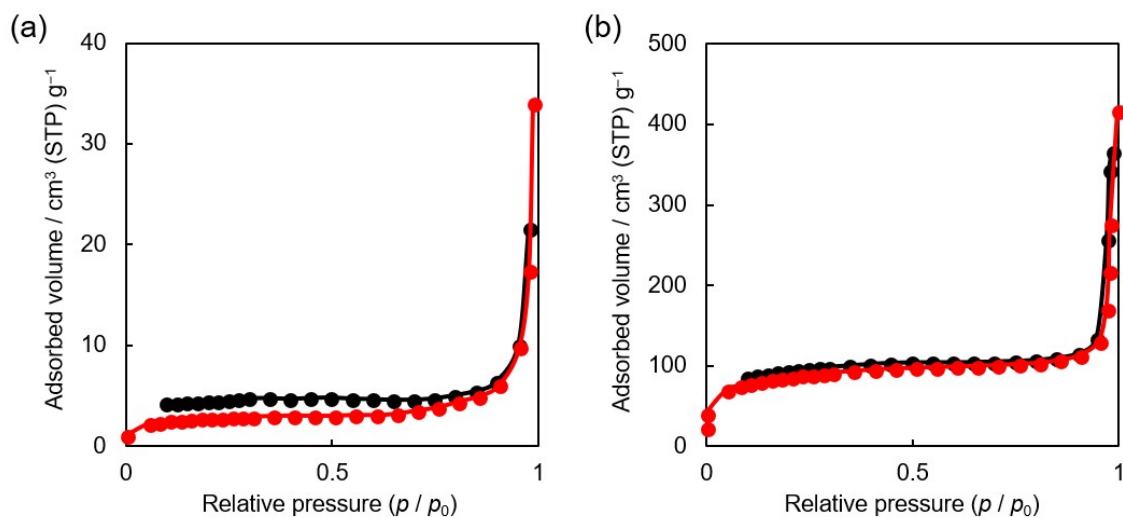

**Fig. S9** Nitrogen adsorption (red)–desorption (black) isotherms at  $-196\text{ }^{\circ}\text{C}$  for  $[\text{Fe}^{\text{III}}(\text{H}_2\text{O})_{1.5}]_{4/3}[\text{Fe}^{\text{II}}(\text{CN})_6]$  (Prussian blue) nanoparticles in (a) cubic shape (PB-cube) and (b) spherical shape (PB-sphere).



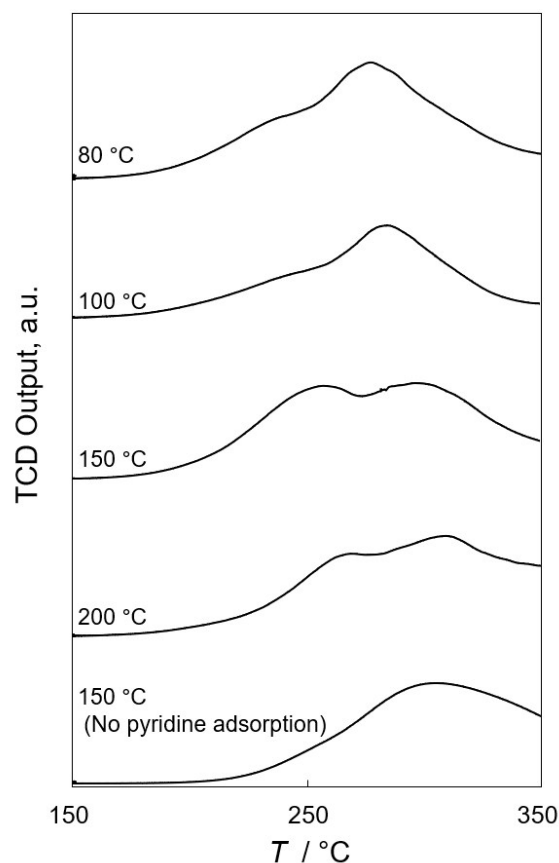

**Fig. S10** Temperature-programmed desorption (TPD) spectra of  $[\text{Fe}^{\text{III}}(\text{H}_2\text{O})_{1.5}]_{4/3}[\text{Fe}^{\text{II}}(\text{CN})_6]$  (58.9 mg, the ramp rate of  $10\text{ }^\circ\text{C min}^{-1}$ ) after pretreatment for removal of physisorbed water for 1 h at temperatures of 80, 100, 150 and 200  $^\circ\text{C}$ , adsorption of pyridine (5 kPa, 100  $^\circ\text{C}$  for 30 min) and removal of excess pyridine (150  $^\circ\text{C}$ , 30 min) with a flow of helium (He, 30  $\text{mL min}^{-1}$ ). The TPD spectrum without pyridine adsorption was obtained after pretreatment at 150  $^\circ\text{C}$ .

**Comments:** A sharp TPD peak at around 264  $^\circ\text{C}$  after pretreatment at 150  $^\circ\text{C}$  was assigned to pyridine desorption, because this peak was indistinct for  $[\text{Fe}^{\text{III}}(\text{H}_2\text{O})_{1.5}]_{4/3}[\text{Fe}^{\text{II}}(\text{CN})_6]$  without pyridine adsorption. The second peak at around 300  $^\circ\text{C}$  was assigned to loss of CN ligands of  $[\text{Fe}^{\text{III}}(\text{H}_2\text{O})_{1.5}]_{4/3}[\text{Fe}^{\text{II}}(\text{CN})_6]$  as confirmed by the TPD spectrum of  $[\text{Fe}^{\text{III}}(\text{H}_2\text{O})_{1.5}]_{4/3}[\text{Fe}^{\text{II}}(\text{CN})_6]$  without pyridine adsorption. The TPD peak at around 264  $^\circ\text{C}$  was not clearly observed for  $[\text{Fe}^{\text{III}}(\text{H}_2\text{O})_{1.5}]_{4/3}[\text{Fe}^{\text{II}}(\text{CN})_6]$  pretreated at 80, 100 and 200  $^\circ\text{C}$ . Thus, the appropriate pretreatment temperature is 150  $^\circ\text{C}$ .

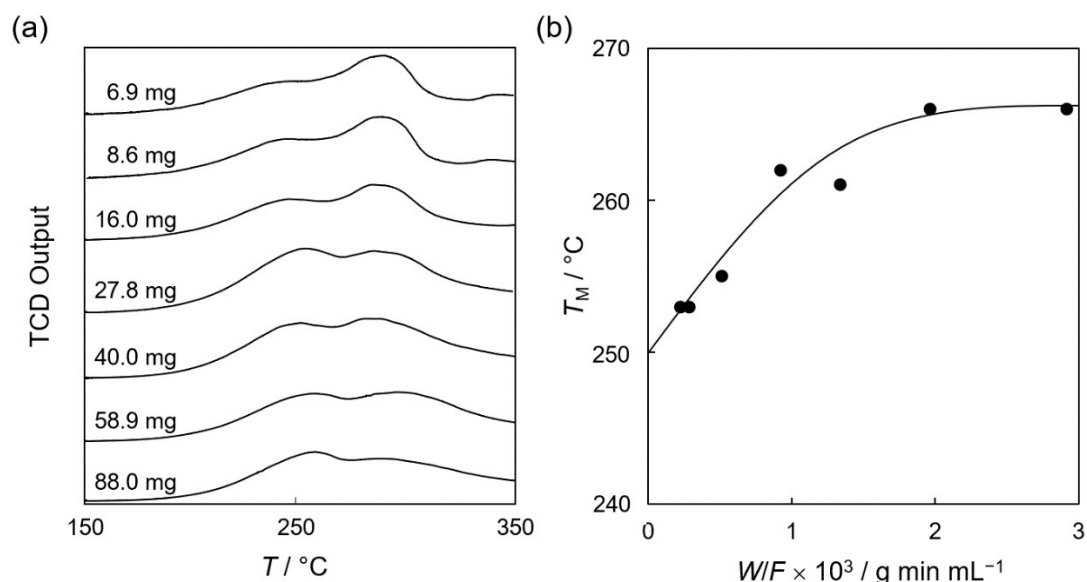

**Fig. S11** (a) Temperature-programmed desorption (TPD) spectra of various weight of  $[\text{Fe}^{\text{III}}(\text{H}_2\text{O})_{1.5}]_{4/3}[\text{Fe}^{\text{II}}(\text{CN})_6]$  (the ramp rate of  $10\text{ }^\circ\text{C min}^{-1}$ ) after pretreatment for removal of physisorbed water ( $150\text{ }^\circ\text{C}$ , 1 h), adsorption of pyridine (5 kPa,  $100\text{ }^\circ\text{C}$  for 30 min) and removal of excess pyridine ( $150\text{ }^\circ\text{C}$ , 30 min) with a flow of helium (He,  $30\text{ mL min}^{-1}$ ). (b) Relation of temperature of pyridine-desorption maximum ( $T_M$ ) to  $W/F$  where  $W$  and  $F$  represent weight of samples and a flow rate of He, respectively.

**Comments:** The weight of  $[\text{Fe}^{\text{III}}(\text{H}_2\text{O})_{1.5}]_{4/3}[\text{Fe}^{\text{II}}(\text{CN})_6]$  used for the TPD measurements ( $W$ ) was optimized, because the temperature of pyridine-desorption maximum ( $T_M$ ) depends on  $W/F$ , where  $F$  is the flow rate of He. Constant  $T_M$  can be obtained when  $W$  is large enough, because readsorption of the desorbed pyridine occurs. Eq.11 can

$$\ln \frac{T_M^2}{\beta} = \frac{\Delta H}{RT_M} + \ln \left[ \frac{(1-\theta)^2 V_s \Delta H}{FAR} \right] \quad (11)$$

be derived under consideration of the balance of pyridine with desorption and readsorption, where  $\beta$ ,  $\Delta H$ ,  $R$ ,  $F$ ,  $\theta$ ,  $V_s$  and  $A$  stand for ramp rate, heat of desorption of pyridine, the gas constant, gas flow rate, coverage of catalyst surface, catalyst volume and pre-exponential factor, respectively.<sup>S1</sup> TPD measurements carried out with changing  $W$  (6.9–88.0 mg) showed the shift of  $T_M$  from 251 to 264 °C (Figure S10a). The plot of  $T_M$  vs.  $W/F$  suggests that  $T_M$  is almost constant when  $W/F$  is larger than  $2.0 \times 10^3$  (Figure S10b). Thus, the used weight of samples was larger than 60 mg with the flow rate of He of  $30\text{ mL min}^{-1}$  for further analyses.

## Reference

S1 M. Nakano, T. Hironaka, S. Fujii and K. Sekizawa, *Toyo Soda Kenkyu Hokoku*, 1985, **29**, 3–11.

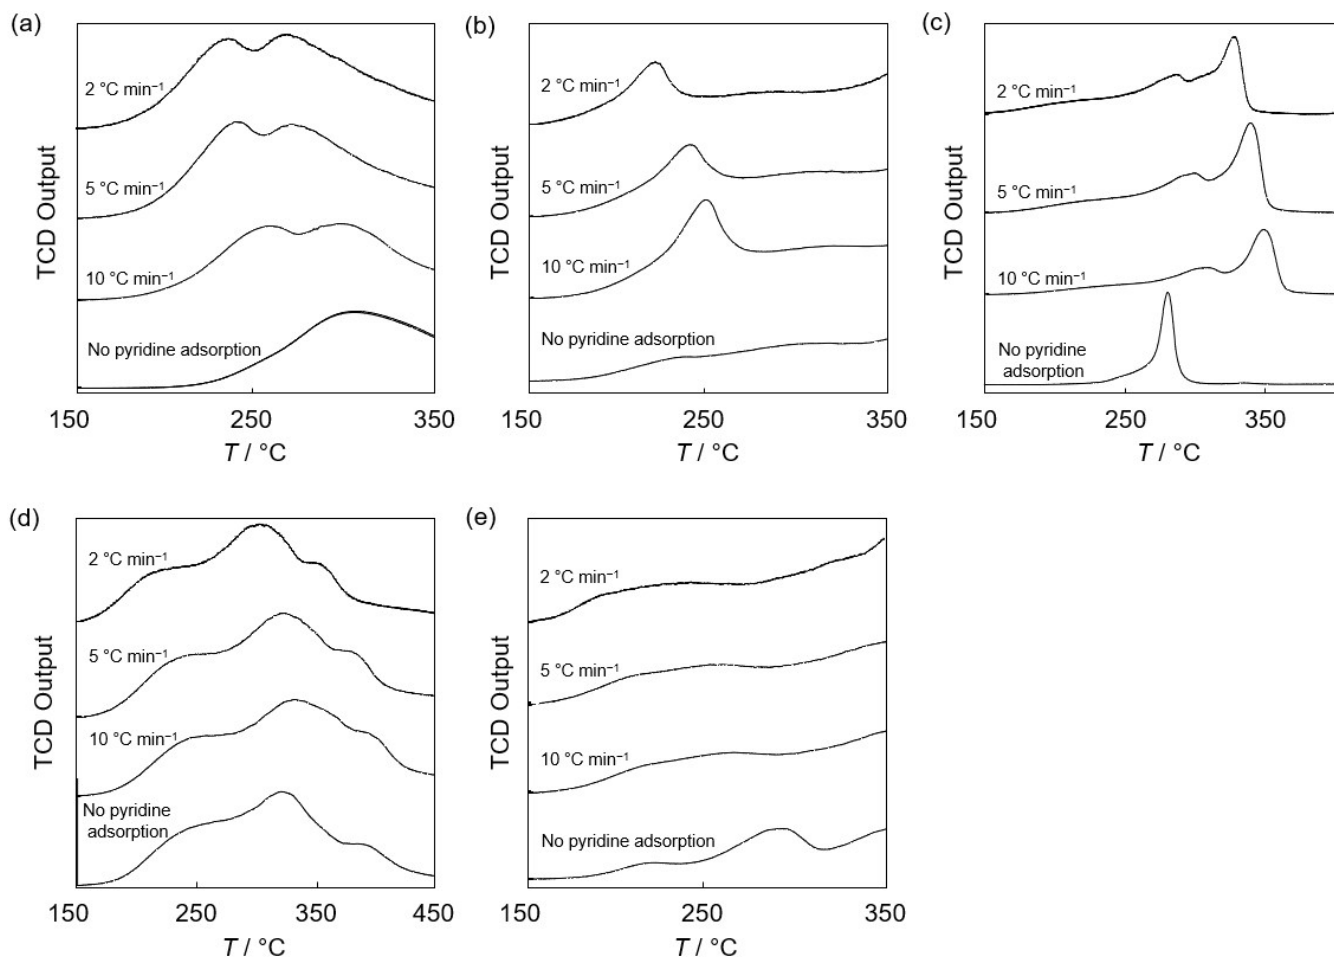

**Fig. S12** Temperature-programmed desorption (TPD) of pyridine from (a)  $[\text{Fe}^{\text{III}}(\text{H}_2\text{O})_{1.5}]_{4/3}[\text{Fe}^{\text{II}}(\text{CN})_6]$ , (b)  $\text{Fe}^{\text{III}}[\text{Co}^{\text{III}}(\text{CN})_6]$ , (c)  $[\text{Mn}^{\text{II}}(\text{H}_2\text{O})_2]_{1.5}[\text{Fe}^{\text{III}}(\text{CN})_6]$ , (d)  $\text{Ga}^{\text{III}}[\text{Fe}^{\text{III}}(\text{CN})_6]$  and (e)  $[\text{Fe}^{\text{II}}(\text{H}_2\text{O})_2]_{1.5}[\text{Co}^{\text{III}}(\text{CN})_6]$ . TPD measurements were performed by heating with various ramp rates ranging from 2 to 10  $^{\circ}\text{C min}^{-1}$  after pretreatment at 150  $^{\circ}\text{C}$ , 1 h, adsorption of pyridine (5 kPa, 100  $^{\circ}\text{C}$  for 30 min) and removal of excess pyridine (150  $^{\circ}\text{C}$ , 30 min) with a flow of helium (30  $\text{mL min}^{-1}$ ). The TPD spectra without pyridine adsorption was obtained after pretreatment at 150  $^{\circ}\text{C}$ .

**Comments:** Multiple peaks appeared for (d)  $\text{Ga}^{\text{III}}[\text{Fe}^{\text{III}}(\text{CN})_6]$  and (e)  $[\text{Fe}^{\text{II}}(\text{H}_2\text{O})_2]_{1.5}[\text{Co}^{\text{III}}(\text{CN})_6]$  without pyridine adsorption. These peaks can be assigned to loss of chemisorbed water molecules and CN ligands, which were also confirmed by TGA (Fig. S3).

**Table S1** Weight and molar ratios of iron (Fe), potassium (K) and another metal species (M) in each cyano-bridged polynuclear metal complex determined by X-ray fluorescence measurements

| Complex                                                                                        | M  | Weight ratio | Molar ratio | Weight ratio | Molar ratio |
|------------------------------------------------------------------------------------------------|----|--------------|-------------|--------------|-------------|
|                                                                                                |    | M/Fe         | M/Fe        | K/Fe         | K/Fe        |
| $[\text{Fe}^{\text{III}}(\text{H}_2\text{O})_{1.5}]_{4/3}[\text{Fe}^{\text{II}}(\text{CN})_6]$ | –  | –            | –           | 0.04         | 0.1         |
| $\text{Fe}^{\text{III}}[\text{Co}^{\text{III}}(\text{CN})_6]$                                  | Co | 0.9          | 0.9         | 0            | 0           |
| $\text{Fe}^{\text{III}}[\text{Ir}^{\text{III}}(\text{CN})_6]$                                  | Ir | 3.8          | 1.1         | 0            | 0           |
| $[\text{Fe}^{\text{III}}(\text{H}_2\text{O})_{1.5}]_{4/3}[\text{Ru}^{\text{II}}(\text{CN})_6]$ | Ru | 1.9          | 0.8         | 0.05         | 0.1         |
| $[\text{Fe}^{\text{II}}(\text{H}_2\text{O})_2]_{1.5}[\text{Co}^{\text{III}}(\text{CN})_6]$     | Co | 0.7          | 0.6         | 0.02         | 0.1         |
| $[\text{Fe}^{\text{II}}(\text{H}_2\text{O})_2]_{1.5}[\text{Ir}^{\text{III}}(\text{CN})_6]$     | Ir | 2.1          | 1.4         | 0.04         | 0           |
| $[\text{Fe}^{\text{II}}(\text{H}_2\text{O})_3]_2[\text{Ru}^{\text{II}}(\text{CN})_6]$          | Ru | 1.0          | 1.8         | 0.04         | 0.1         |
| $\text{Fe}^{\text{II}}[\text{Pt}^{\text{IV}}(\text{CN})_6]$                                    | Pt | 3.3          | 1.4         | 0            | 0           |
| $[\text{Mn}^{\text{II}}(\text{H}_2\text{O})_2]_{1.5}[\text{Fe}^{\text{III}}(\text{CN})_6]$     | Mn | 1.5          | 1.5         | 0.03         | 0           |
| $[\text{Co}^{\text{II}}(\text{H}_2\text{O})_2]_{1.5}[\text{Fe}^{\text{III}}(\text{CN})_6]$     | Co | 1.5          | 1.4         | 0.05         | 0.1         |
| $[\text{Zn}^{\text{II}}(\text{H}_2\text{O})_2]_{1.5}[\text{Fe}^{\text{III}}(\text{CN})_6]$     | Zn | 2.4          | 2.1         | 0.05         | 0.1         |
| $\text{Ga}^{\text{III}}[\text{Fe}^{\text{III}}(\text{CN})_6]$                                  | Ga | 1.2          | 0.9         | 0            | 0           |
| $[\text{Ga}^{\text{III}}(\text{H}_2\text{O})_{1.5}]_{4/3}[\text{Fe}^{\text{II}}(\text{CN})_6]$ | Ga | 1.6          | 1.3         | 0            | 0           |

**Table S2** Lattice parameters ( $a$ ), CN stretching frequencies ( $\nu_{\text{CN}}$ ), Brunauer–Emmett–Teller (BET) surface areas ( $S$ ), external surface areas obtained by  $t$ -Plot ( $S_{\text{ext}}$ ), pore diameters obtained by the Barrett–Joyner–Halenda (BJH) method and the microporous (MP) method and average particle sizes of  $[\text{Fe}^{\text{III}}(\text{H}_2\text{O})_{1.5}]_{4/3}[\text{Fe}^{\text{II}}(\text{CN})_6]$  (Prussian blue) prepared by a conventional method (PB), Prussian blue in cubic shape (PB-cube) and Prussian blue in spherical shape (PB-sphere)

| Complex   | $a / \text{Å}$ | $\nu_{\text{CN}} / \text{cm}^{-1}$ | $S / \text{m}^2 \text{g}^{-1}$ | $S_{\text{ext}} / \text{m}^2 \text{g}^{-1}$ | Pore diameter / nm | Average particle size / nm |
|-----------|----------------|------------------------------------|--------------------------------|---------------------------------------------|--------------------|----------------------------|
| PB        | 10.2           | 2080                               | 384                            | 9                                           | 3.5                | –                          |
| PB-cube   | 10.3           | 2080                               | 10                             | 3                                           | 0.6                | 300                        |
| PB-sphere | 10.2           | 2086                               | 300                            | 25                                          | 0.6                | 150                        |

**Table S3** Summary of temperature of pyridine-desorption maximum ( $T_M$ ), heat of pyridine desorption ( $\Delta H$ ) of cyano-bridged polynuclear metal complexes, and initial rate for catalytic hydrolysis of *p*-nitrophenyl phosphate (*p*-NPP) using the complexes

| Complex                                                                                        | $T_M / ^\circ\text{C}^a$ | $\Delta H / \text{kJ mol}^{-1}$ | $v_0 / \text{mol L}^{-1} \text{h}^{-1} \text{ }^b$ |
|------------------------------------------------------------------------------------------------|--------------------------|---------------------------------|----------------------------------------------------|
| $[\text{Fe}^{\text{III}}(\text{H}_2\text{O})_{1.5}]_{4/3}[\text{Fe}^{\text{II}}(\text{CN})_6]$ | 264                      | 152                             | $3.1 \times 10^{-3}$                               |
| $\text{Fe}^{\text{III}}[\text{Co}^{\text{III}}(\text{CN})_6]$                                  | 254                      | 160                             | $5.3 \times 10^{-3}$                               |
| $[\text{Mn}^{\text{II}}(\text{H}_2\text{O})_2]_{1.5}[\text{Fe}^{\text{III}}(\text{CN})_6]$     | 309                      | 222                             | $6.5 \times 10^{-3}$                               |
| $\text{Ga}^{\text{III}}[\text{Fe}^{\text{III}}(\text{CN})_6]$                                  | 402                      | 176                             | $6.1 \times 10^{-3}$                               |
| $[\text{Fe}^{\text{II}}(\text{H}_2\text{O})_2]_{1.5}[\text{Co}^{\text{III}}(\text{CN})_6]$     | 243                      | 98                              | $1.0 \times 10^{-3}$                               |

<sup>a</sup>Temperature of pyridine-desorption maximum from each complex with a ramp rate of  $10^\circ\text{C min}^{-1}$ . Each complex was preadsorbed pyridine after pretreatment in a He flow ( $30 \text{ mL min}^{-1}$ ) at  $150^\circ\text{C}$ . <sup>b</sup>Initial rates were determined based on the *p*-NPP conversions for 10 min.
